# Supplementary material
Source: PubMed Central journal article supplement (PMC3640456)
Supplement: NIHMS453597-supplement-Supp_Material.pdf [file NIHMS453597-supplement-Supp_Material.pdf]

Supplementary Materials

**Table S1. Primer sequences and RT-PCR conditions for gene expression analysis.**

| <b>Gene target</b> | <b>Primer sequence</b>         | <b>Temp. °C</b> | <b>final conc. (nM)</b> | <b>Reference</b> |
|--------------------|--------------------------------|-----------------|-------------------------|------------------|
| <i>18 S</i>        | GAG GAT GAG GTG GAA CGT GT     | 60              | 400                     | (1)              |
|                    | GGA CCT GGC TGT ATT TTC CA     | 60              | 400                     | (1)              |
| <i>36B4</i>        | GTG ATG TGC AGC TGA TCA AGA CT | 60              | 400                     | (1)              |
|                    | GAT GAC CAG CCC AAA GGA GA     | 60              | 400                     | (1)              |
| <i>BECN1</i>       | GGA TGG ATG TGG AGA AAG GCA AG | 60              | 400                     | (2)              |
|                    | TGA GGA CAC CCA AGC AAG ACC    | 60              | 400                     | (2)              |
| <i>MAPLC3</i>      | GCC TTC TTC CTG CTG GTG AAC    | 60              | 400                     | (2)              |
|                    | AGC CGT CCT CGT CTT TCT CC     | 60              | 400                     | (2)              |
| <i>NRF 1</i>       | GGT GCA GCA CCT TTG GAG AA     | 60              | 400                     | (1)              |
|                    | CCA GAG CAG ACT CCA GGT CTT C  | 60              | 400                     | (1)              |
| <i>COXIV</i>       | CAT GTG GCA GAA GCA CTA TGT GT | 60              | 400                     | (1)              |
|                    | GCC ACC CAC TCT TTG TCA AAG    | 60              | 400                     | (1)              |
| <i>COXI</i>        | CTG CTA TAG TGG AGG CCG GA     | 60              | 400                     | (3)              |
|                    | GGG TGG GAG TAG TTC CCT GC     | 60              | 400                     | (3)              |
| <i>MFN1</i>        | TGT TTT GGT CGC AAA CTC TG     | 60              | 400                     | (1)              |
|                    | CTG TCT GCG TAC GTC TTC CA     | 60              | 400                     | (1)              |
| <i>OPA1</i>        | GCA ATG GGA TGC AGC TAT TT     | 60              | 400                     | (4)              |
|                    | CAC TGT TCT TGG GTC CGA TT     | 60              | 400                     | (4)              |
| <i>FIS1</i>        | CGA GCT GGT GTC TGT GGA GGA CC | 60              | 400                     | Designed         |
|                    | TGT CAA TGA GCC GCT CCA GTT CC | 60              | 400                     | Designed         |
| <i>PGC1a</i>       | CCT TGC AGC ACA AGA AAA CA     | 62              | 400                     | Designed         |
|                    | TGC TTC GTC GTC AAA AAC AG     | 62              | 400                     | Designed         |
| <i>DRP1</i>        | TGG GCG CCG ACA TCA            | 64              | 400                     | (5)              |
|                    | GCT CTG CGT TCC CAC TAC GA     | 64              | 400                     | (5)              |
| <i>TFAM</i>        | CCG AGG TGG TTT TCA TCT GT     | 60              | 400                     | Designed         |
|                    | GCA TCT GGG TTC TGA GCT TT     | 60              | 400                     | Designed         |

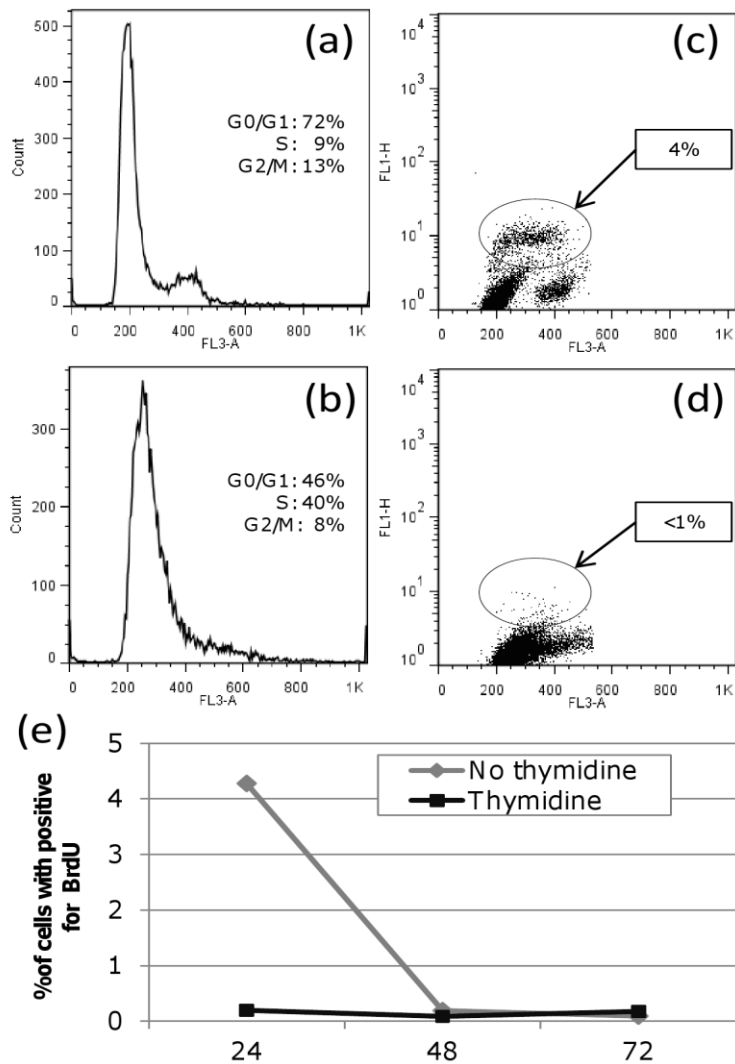

**Figure S1. Excess thymidine arrests cells in S-phase and blocks nDNA synthesis within 24 h.** Cell cycle analysis using PI in (a) untreated and (b) thymidine treated cells. 86% of thymidine treated cells are arrested at G0/G1 or S-phase. BrdU incorporation over an hour incubation period was measured in (c) untreated and (d) thymidine treated cells. Confluent untreated cells have a low level of DNA synthesis (4% of cells positive for BrdU incorporation) 24 h after seeding with further reductions in DNA synthesis at later timepoints presumably due to 100% confluency. (e) Thymidine treatment blocked DNA synthesis at 24-72 h.

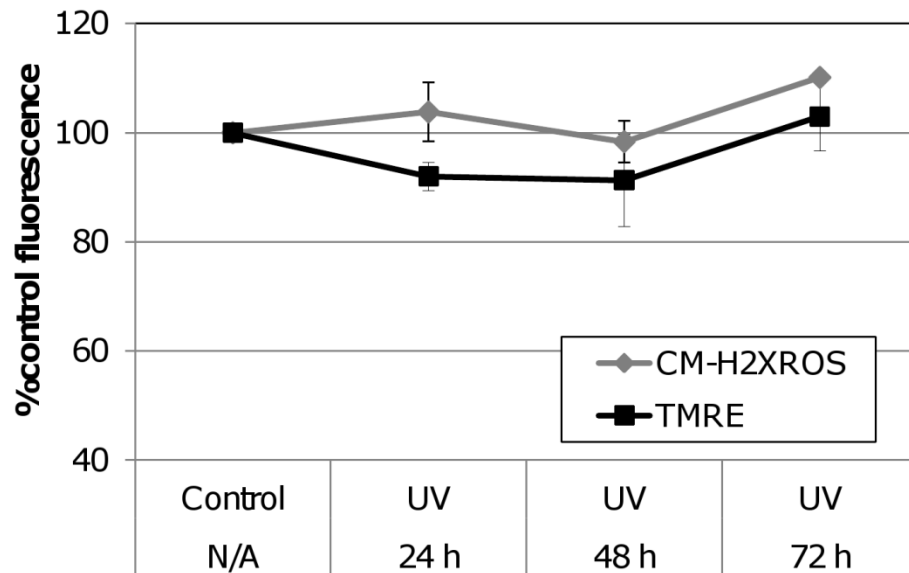

**Figure S2. No detectable changes in mitochondrial MP and ROS level.** UVC exposure did not induce detectable changes in mitochondrial MP or ROS level at any time point (two-way ANOVA, treatment x recovery for TMRE and CM-H<sub>2</sub>XROS P = 0.2086 and 0.7312, respectively). Bars ± s.e.m.

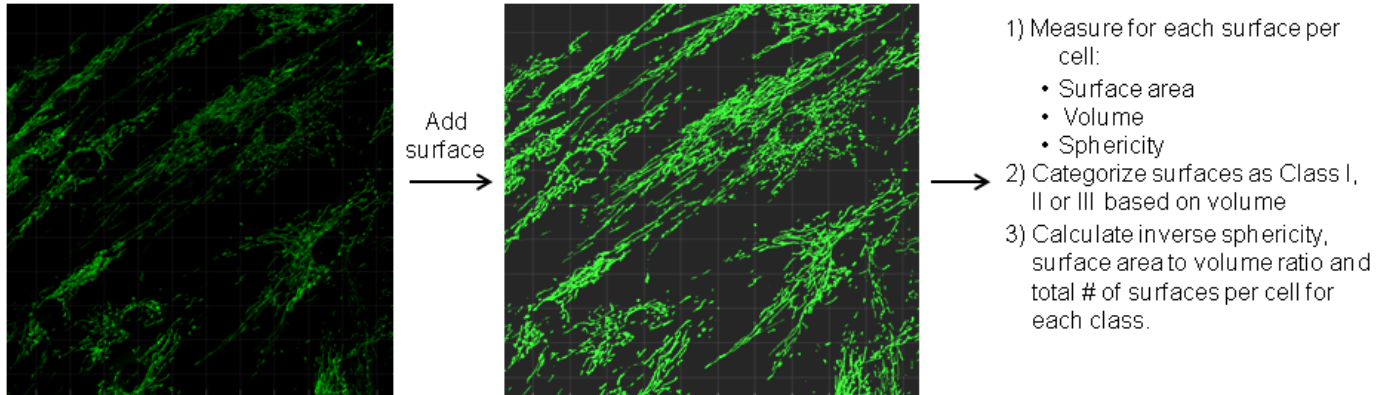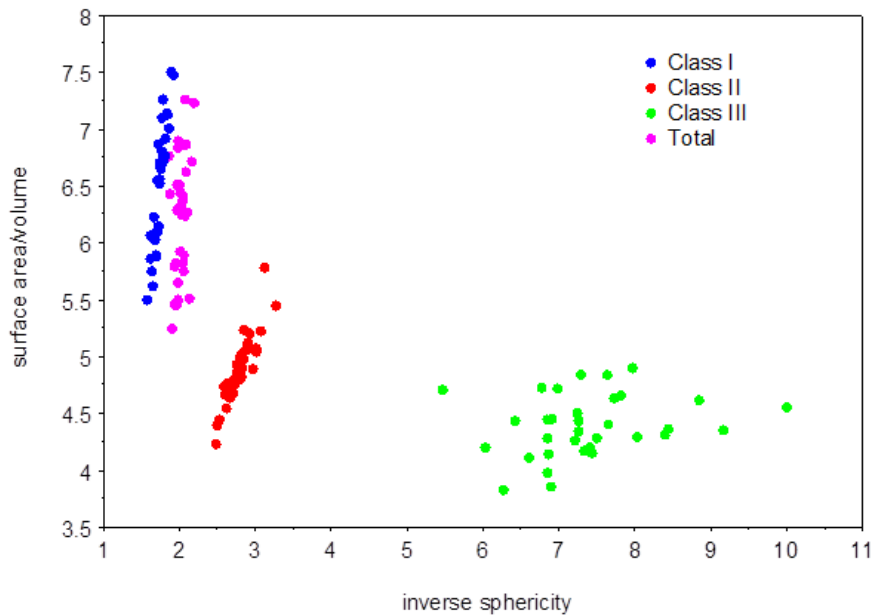

**Figure S3. Mitochondrial morphologic analysis method.** Mitochondria were labeled with MTG and captured via live-cell fluorescence imaging on a Leica SP5 laser scanning confocal microscope. Z-stacks at  $0.38 \mu\text{m}$  thickness were taken at  $1024 \times 1024$  resolution and imported into Imaris 7.3. A representative surface of the mitochondrial network was generated. For each surface the surface area, volume and sphericity was measured. Surfaces were then categorized by volume into three classes: Class I ( $0\text{-}10 \mu\text{m}^3$ ), Class II ( $10\text{-}100 \mu\text{m}^3$ ) and Class III ( $\geq 100 \mu\text{m}^3$ ). Average surface area to volume ratio, inverse sphericity and total number of surfaces were calculated for each class. The scatterplot comparing inverse sphericity to surface area/volume indicates that expressing the average of these parameters of all surfaces (total, pink dots) without volume classification does not accurately represent the variation in the mitochondrial population of each cell. Classes I, II and III (blue, red and green dots, respectively) show distinct relationships between morphological parameters. Therefore, categorizing allows for the identification of treatment-induced shifts in size distribution as well as elongation and interconnectivity.

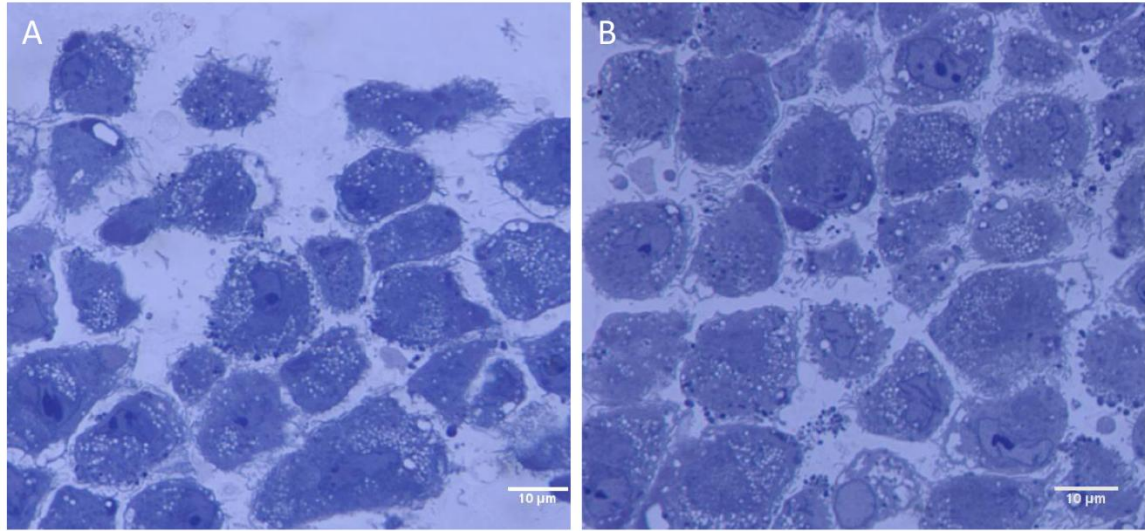

**Figure S4. Toluidine blue stained semi-thin sections of human primary fibroblasts.**

Representative images of (A) control and (B) UVC-treated cells. Cell pellets were embedded in Spurr's resin, cut into semithin sections (500 nm thick), stained with toluidine blue O and imaged by high resolution (60X) light microscopy. Several cells were present in the block face and few cells were identified that demonstrated apoptotic or necrotic features.

## Supplementary References

1. Cartoni, R., et al., Mitofusins 1/2 and ERR $\alpha$  expression are increased in human skeletal muscle after physical exercise. *The Journal of Physiology*, 2005. **567**(1): p. 349-358.
2. Cotan, D., et al., Secondary coenzyme Q10 deficiency triggers mitochondria degradation by mitophagy in MELAS fibroblasts. *The FASEB Journal*, 2011. **25**(8): p. 2669-2687.
3. Merlo Pich, M., et al., Increased transcription of mitochondrial genes for Complex I in human platelets during ageing. *FEBS Letters*, 2004. **558**: p. 19-22.
4. Jendrach, M., et al., Short- and long-term alterations of mitochondrial morphology, dynamics and mtDNA after transient oxidative stress. *Mitochondrion*, 2008. **8**(4): p. 293-304.
5. Manczak, M., M.J. Calkins, and P.H. Reddy, Impaired mitochondrial dynamics and abnormal interaction of amyloid beta with mitochondrial protein Drp1 in neurons from patients with Alzheimer's disease: implications for neuronal damage. *Human Molecular Genetics*, 2011. **20**(13): p. 2495-2509.
